# Supplementary material for: Phenotypic variation of transcriptomic cell types in mouse motor cortex
Source: PubMed Central journal article supplement (PMC8113357; doi:10.1038/s41586-020-2907-3), 2020-11-12

Lamp5 Pax6

Lamp5 Egl3\_1

Lamp5 Egl3\_2

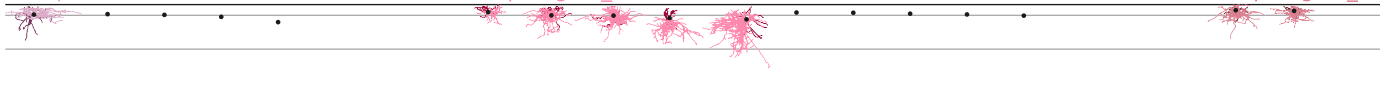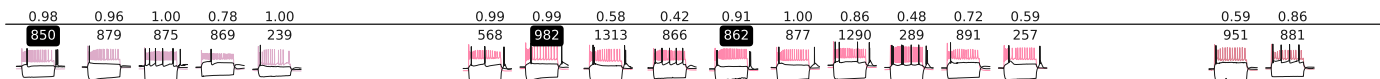

Lamp5 Pdlim5\_1

Lamp5 Pdlim5\_2

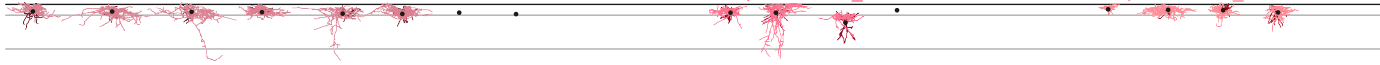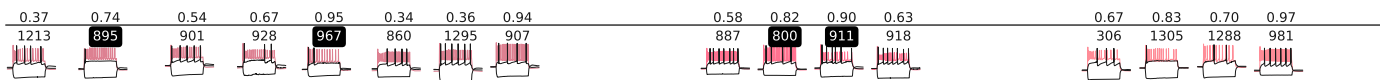

Lamp5 Slc35d3

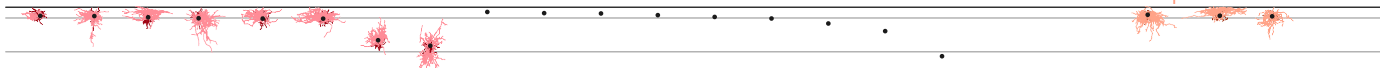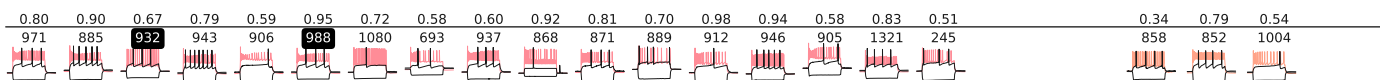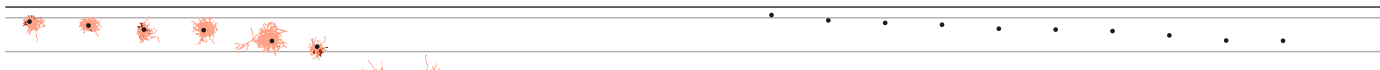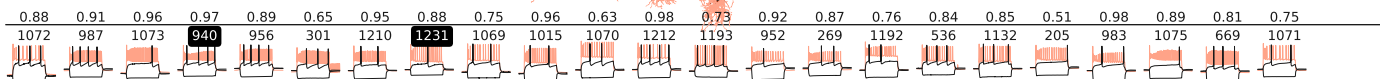

Lamp5 Lhx6

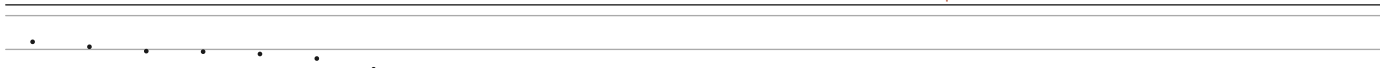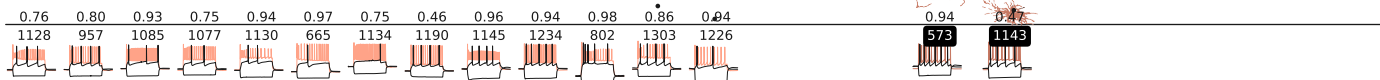

Sncg Col14a1

Sncg Calb1\_1

Sncg Calb1\_2

Sncg Npy2r

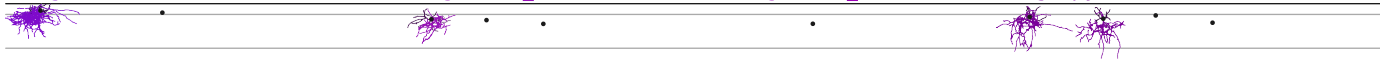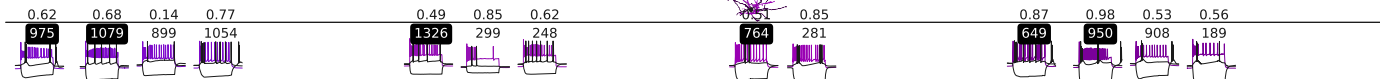

Vip Sncg

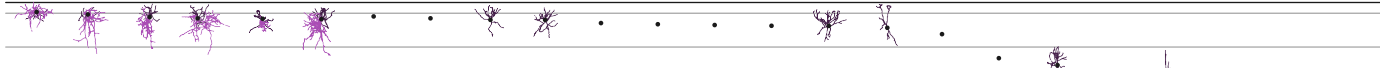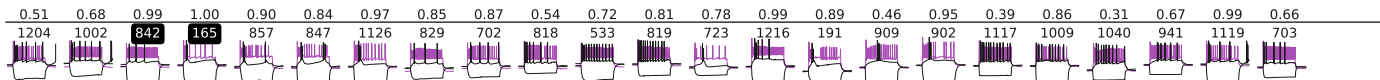

Vip Serpinf1\_1

Vip Serpinf1\_2

Vip Serpinf1\_3

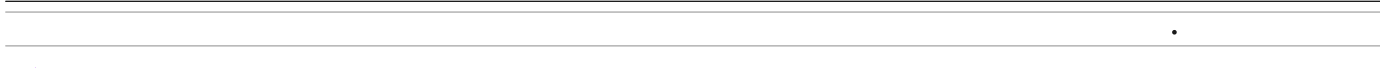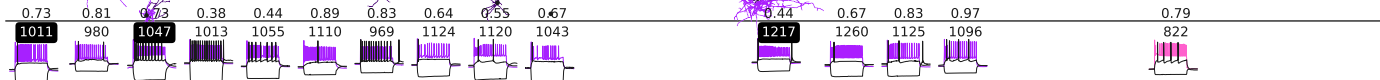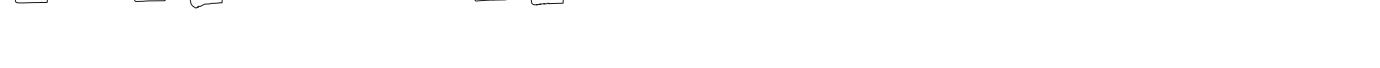

Vip Htr1f

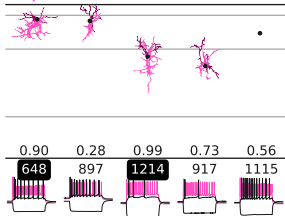

Vip Gpc3

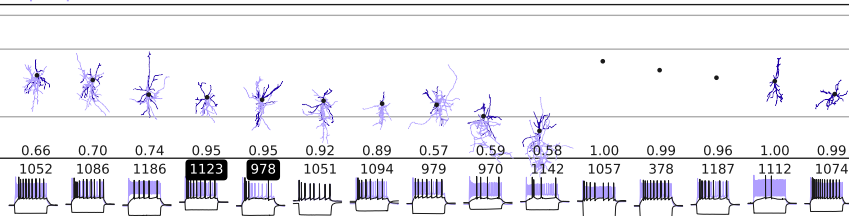

Vip C1ql1

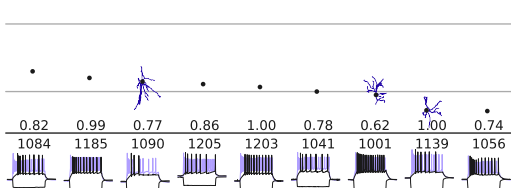

Vip Mybpc1\_2

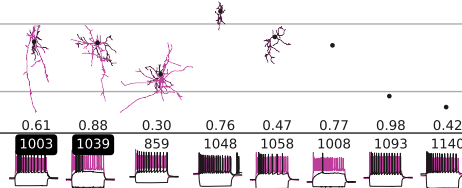

Vip Mybpc1\_1

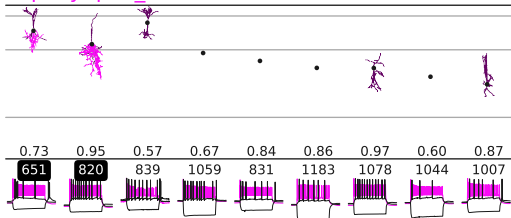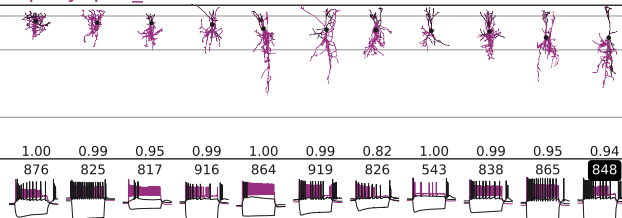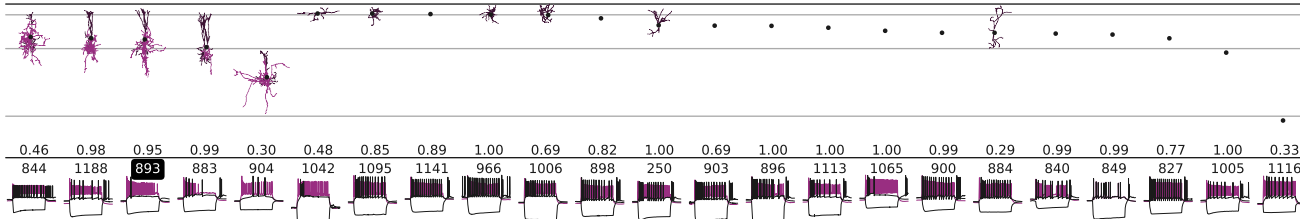

Vip Mybpc1\_3

Vip Chat\_1

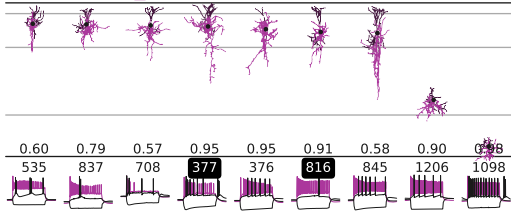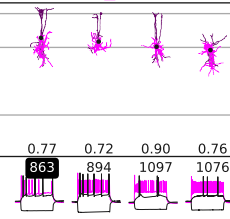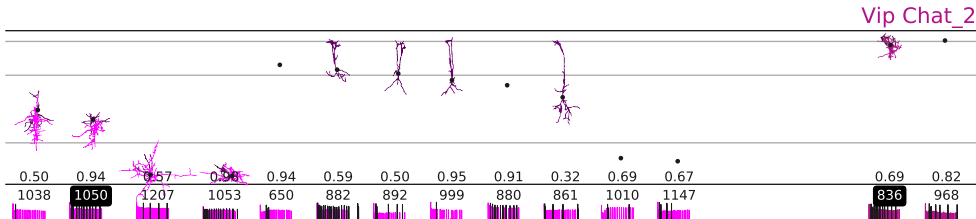

Vip Chat\_2

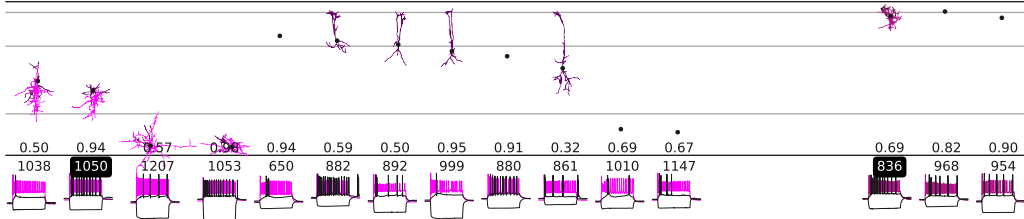

Sst Chodl

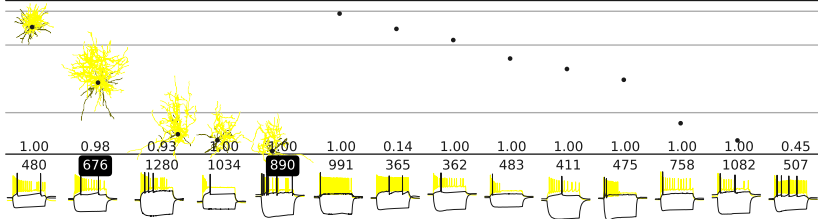

Sst Myh8\_1

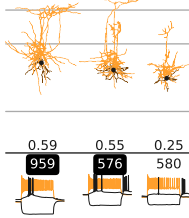

Sst Penk

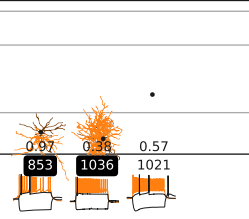

Sst Myh8\_2

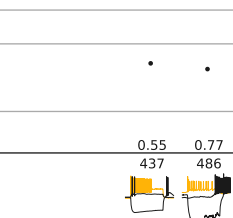

Sst Myh8\_3

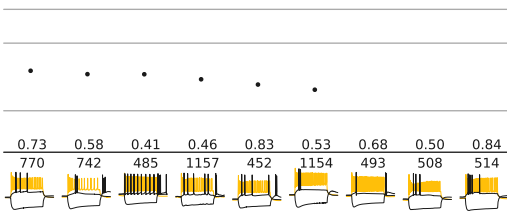

Sst Htr1a

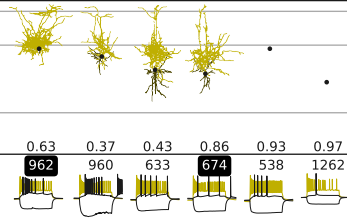

Sst Etv1

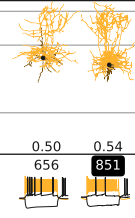

Sst Pvalb Etv1

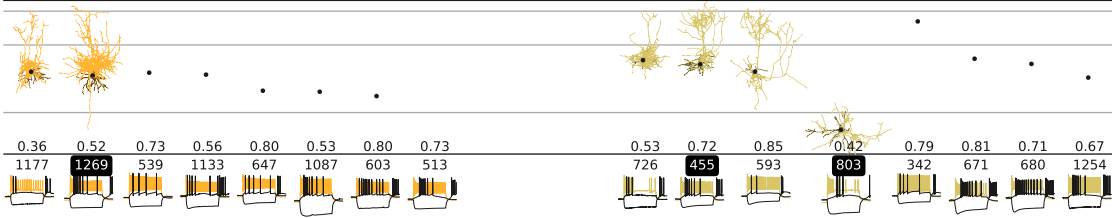

Sst Crhr2\_1

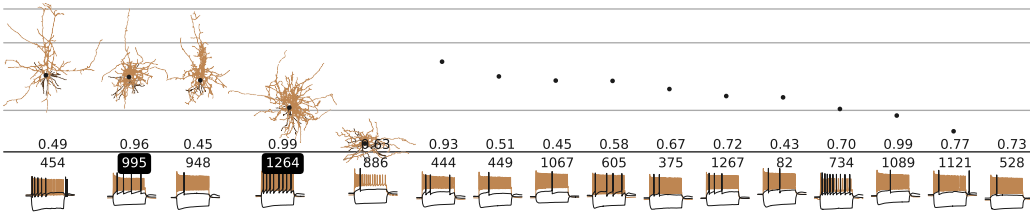

Sst Crhr2\_2

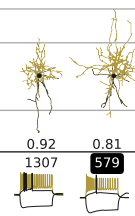

Sst Hpse

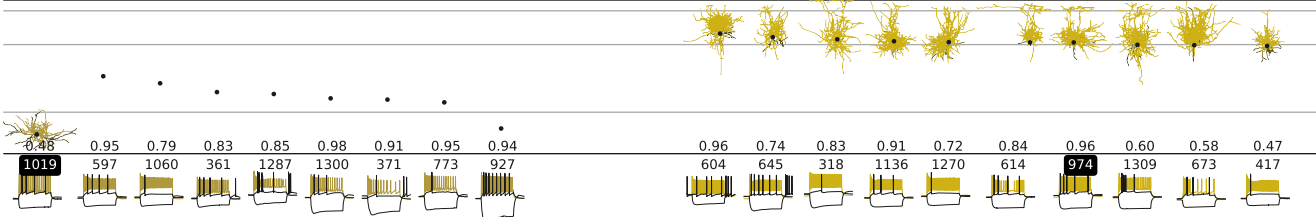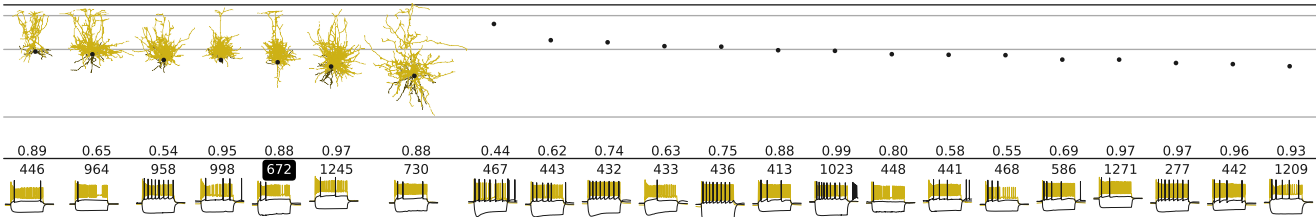

Sst Calb2

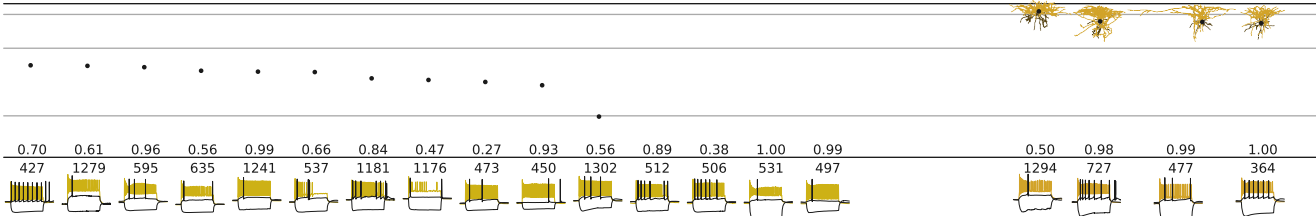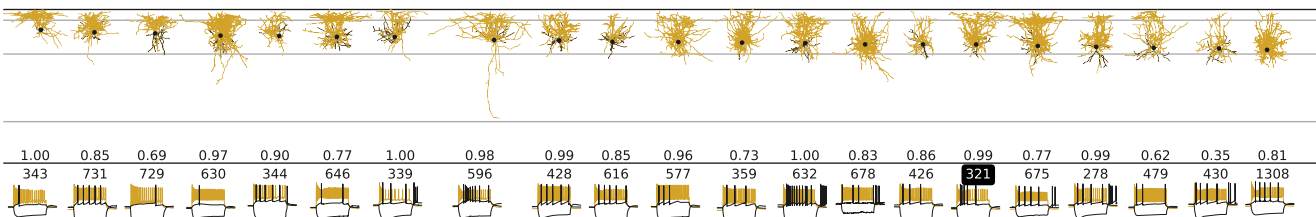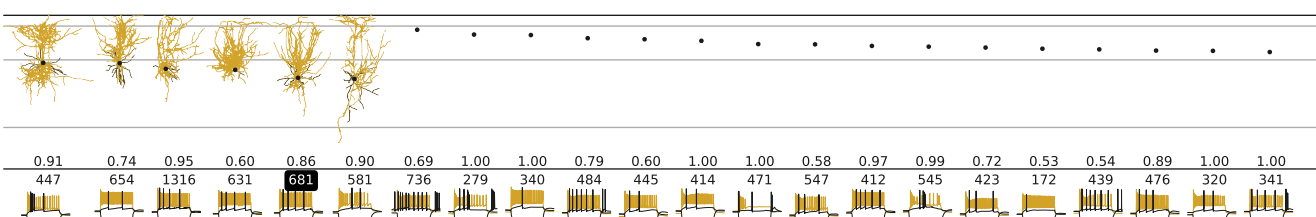

Sst Pvalb Calb2

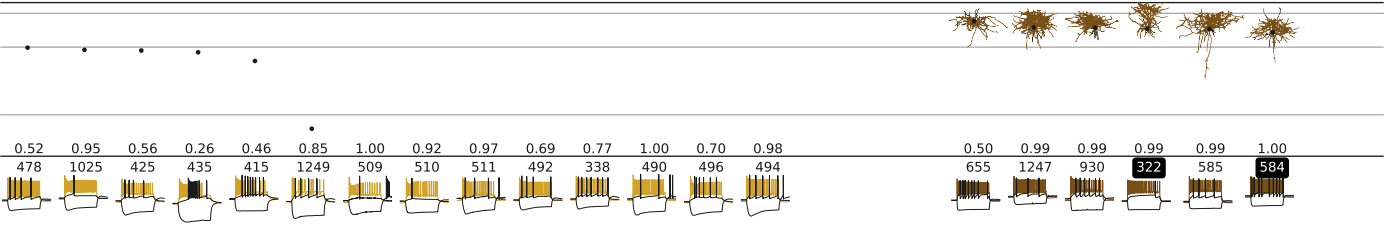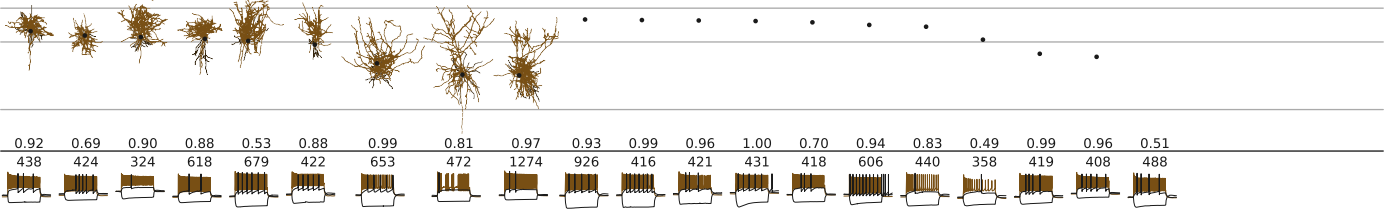

Sst C1ql3\_1

Sst C1ql3\_2

Sst Tac2

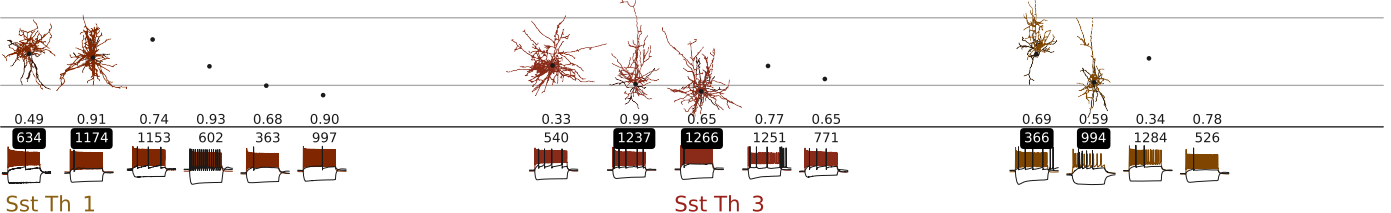

Sst Th\_1

Sst Th\_3

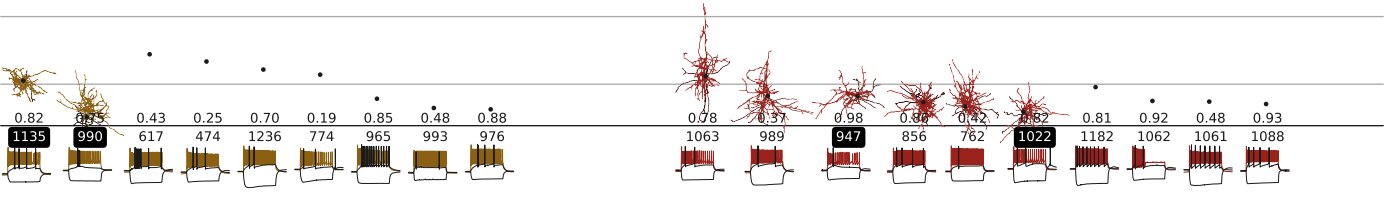

Pvalb Gabrg1

Pvalb Egfem1

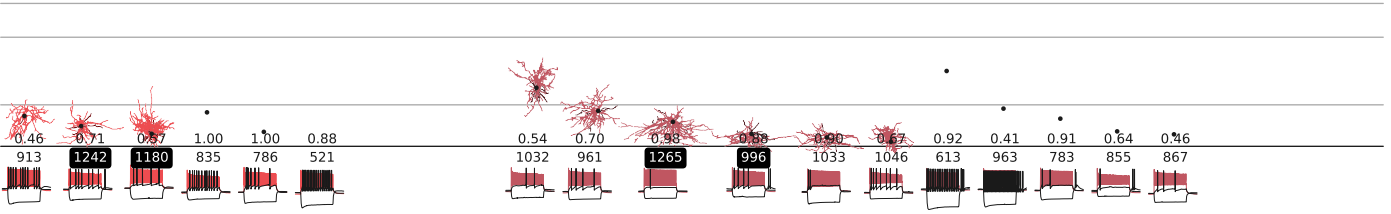

Pvalb Gpr149

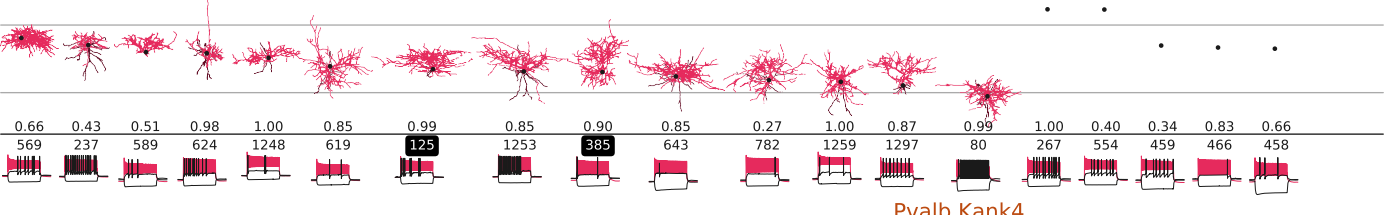

Pvalb Kank4

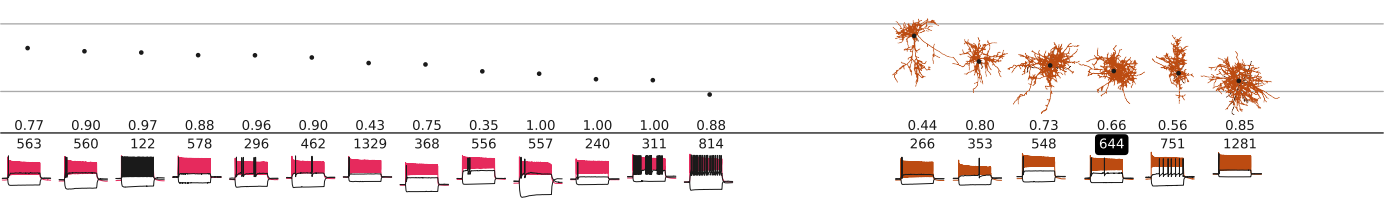

Pvalb Calb1\_1

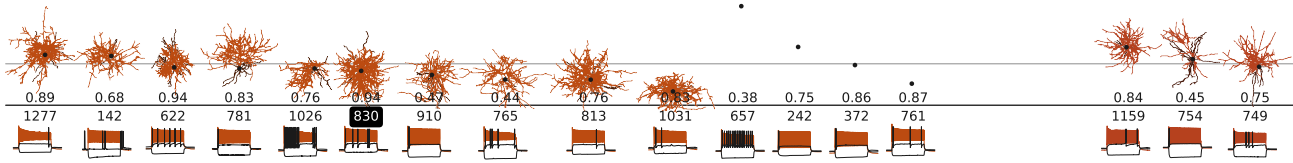

Pvalb Calb1\_2

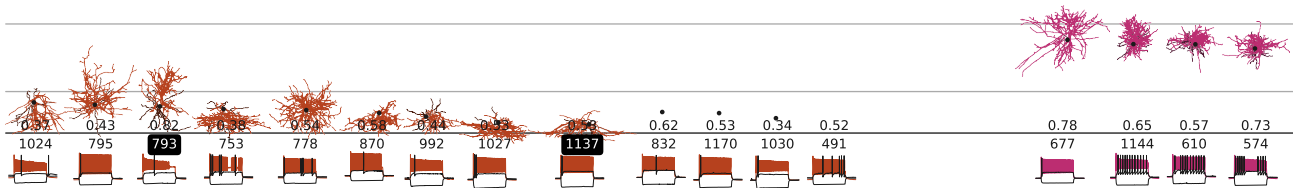

Pvalb Reln

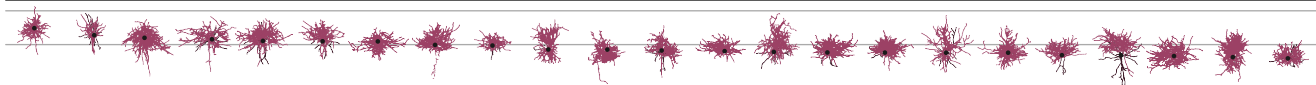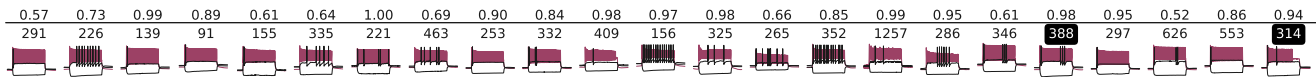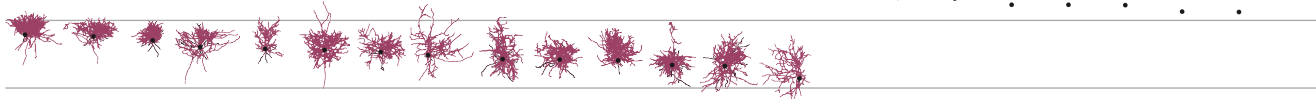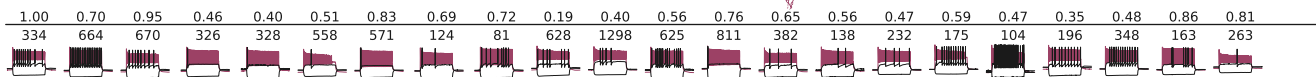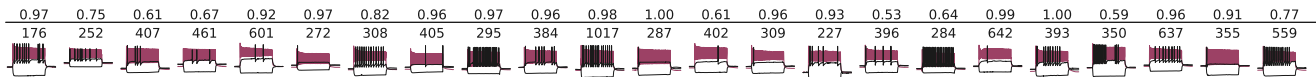

Pvalb Il1rap12

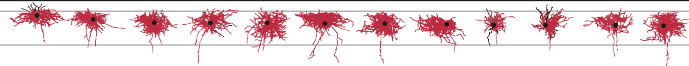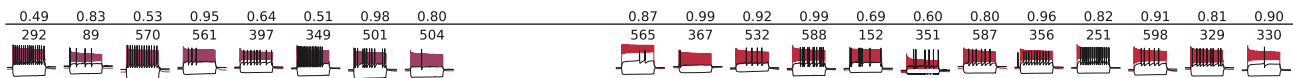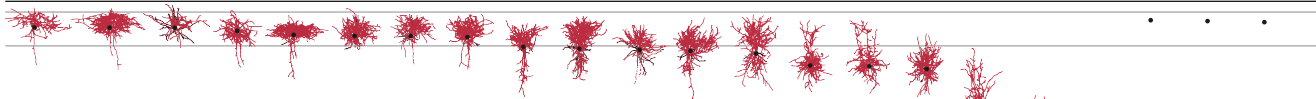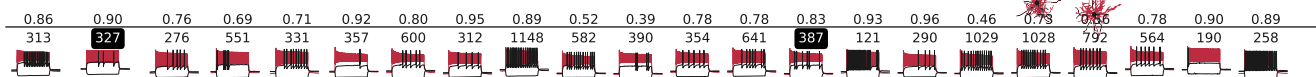

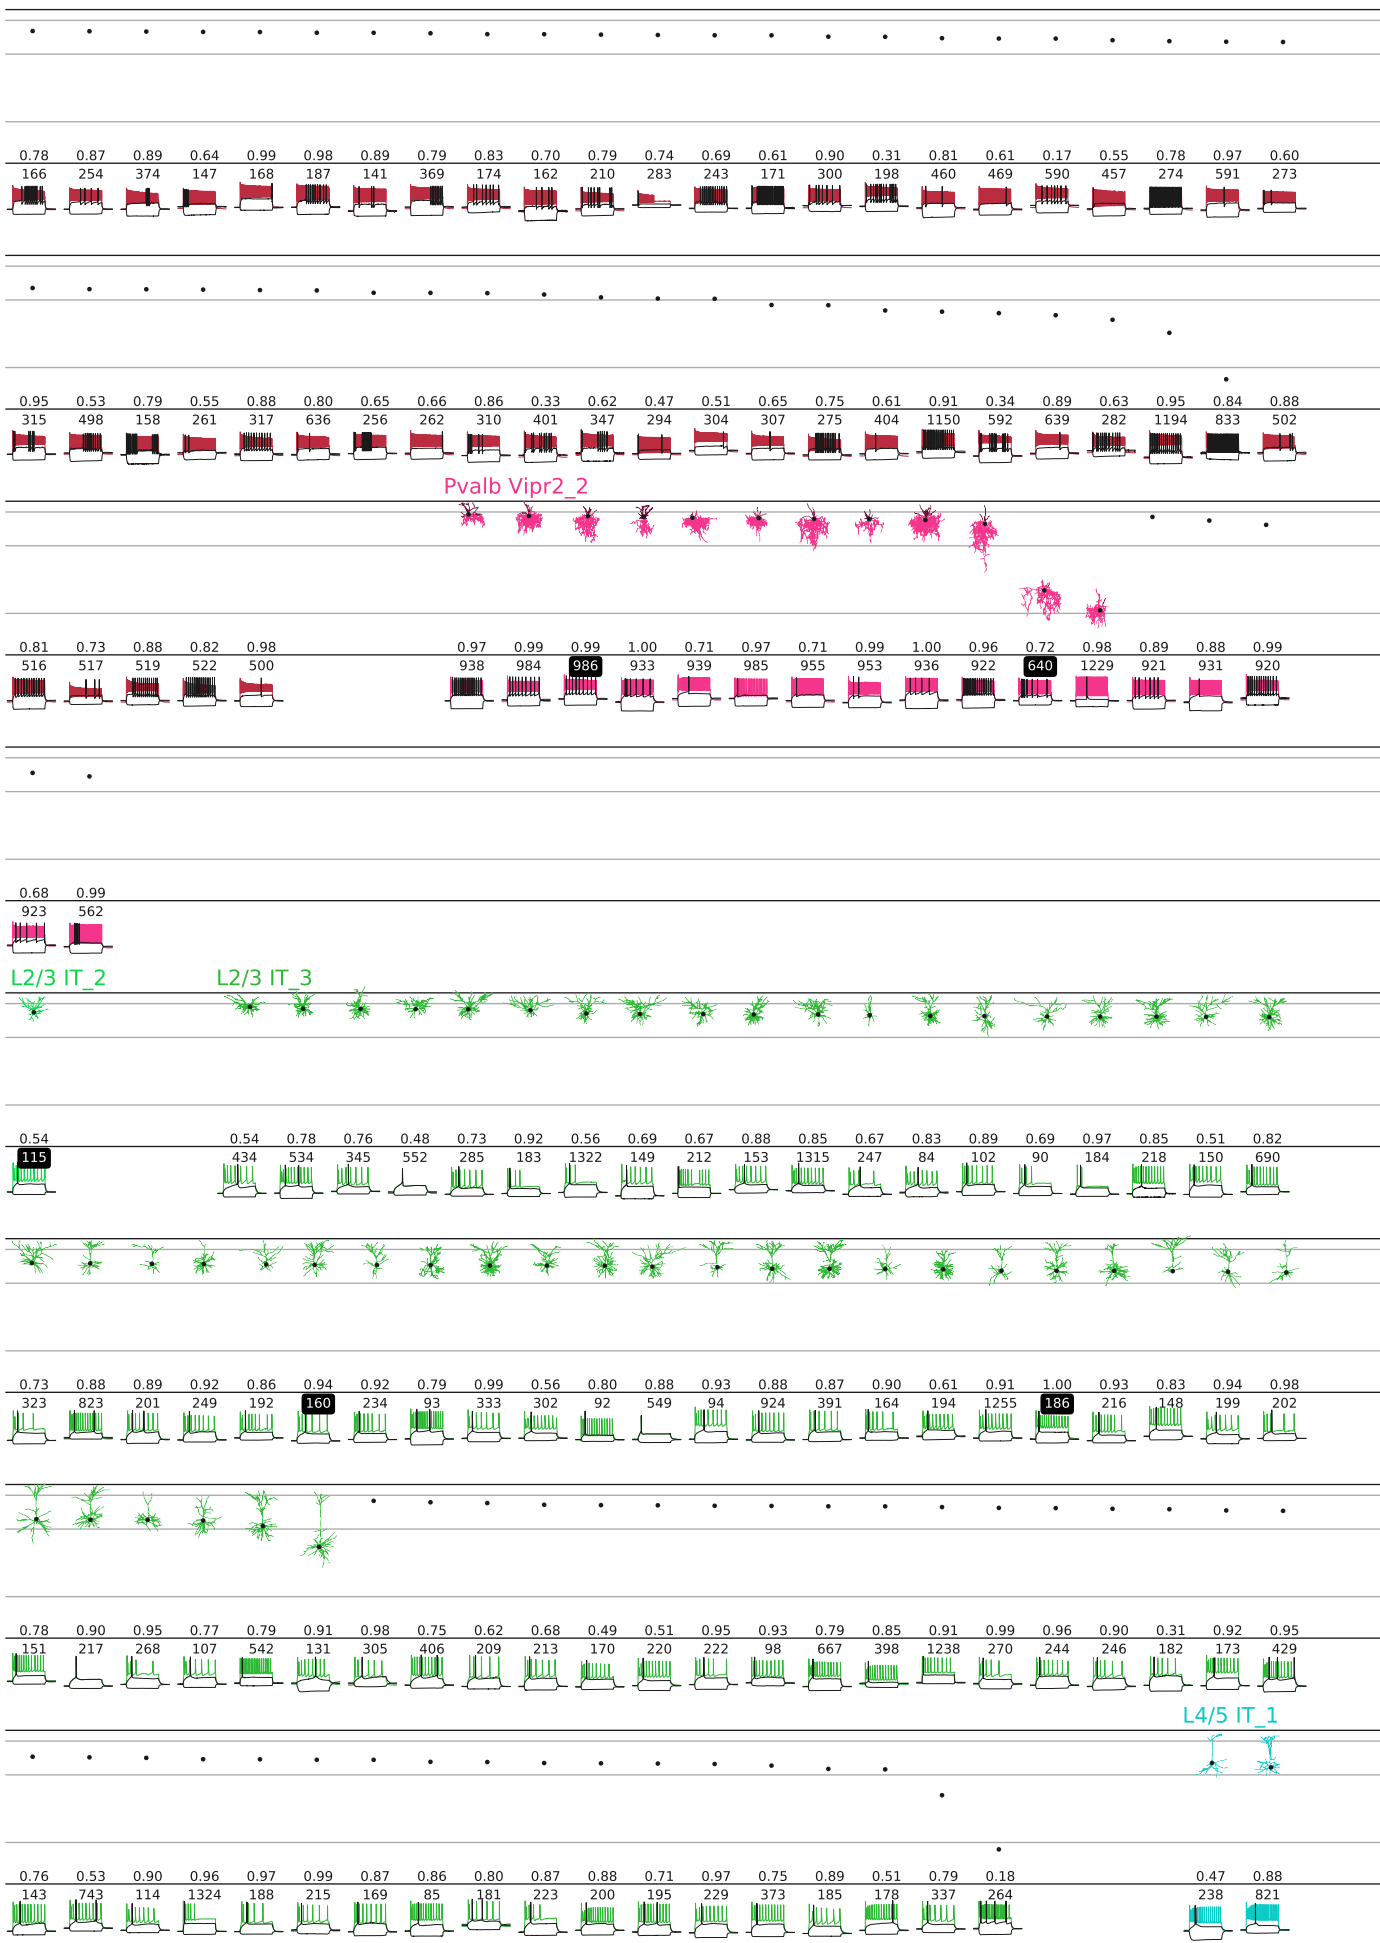

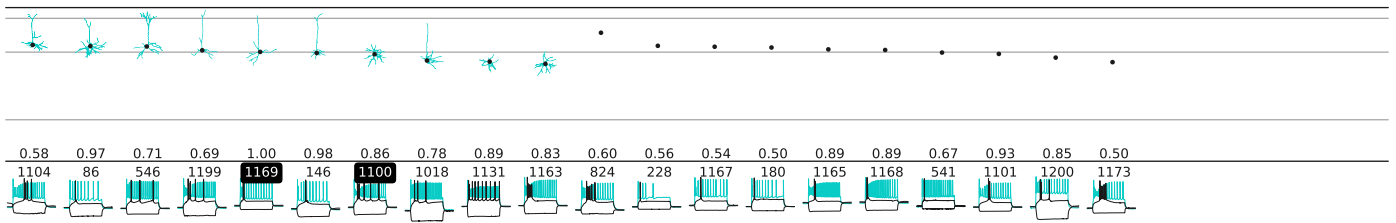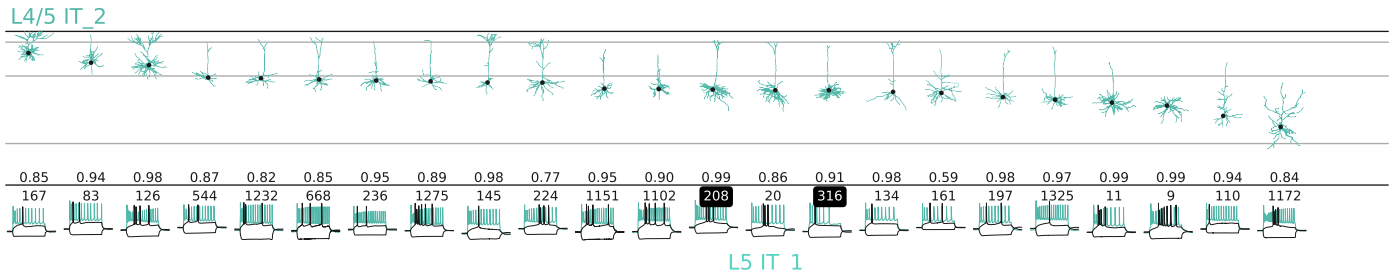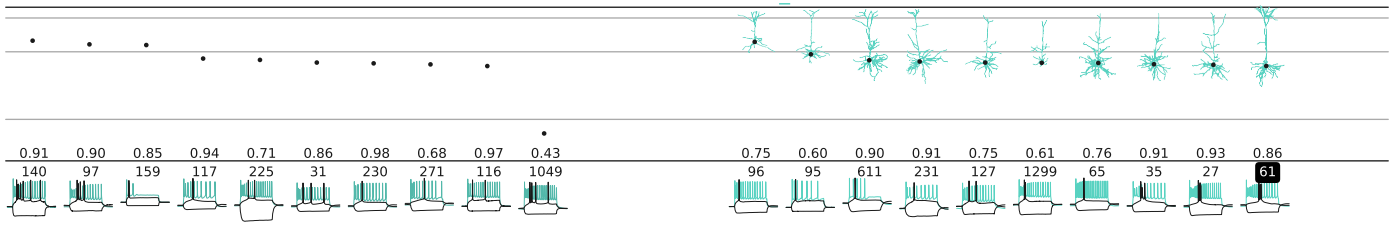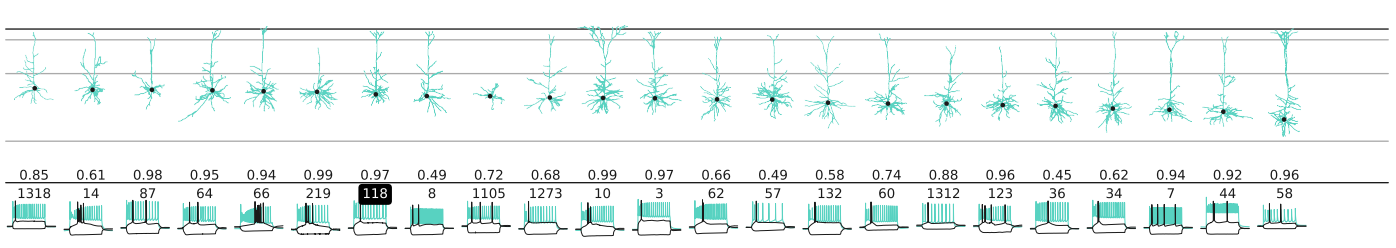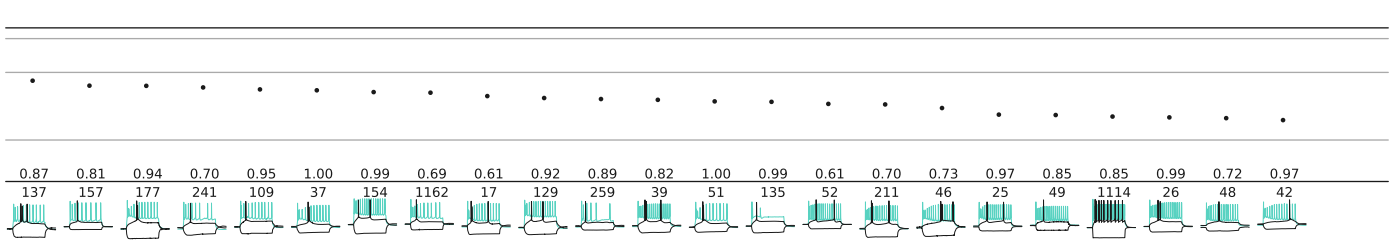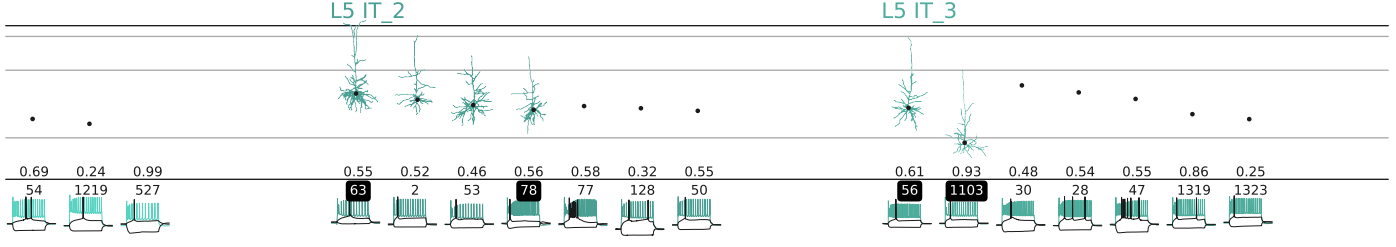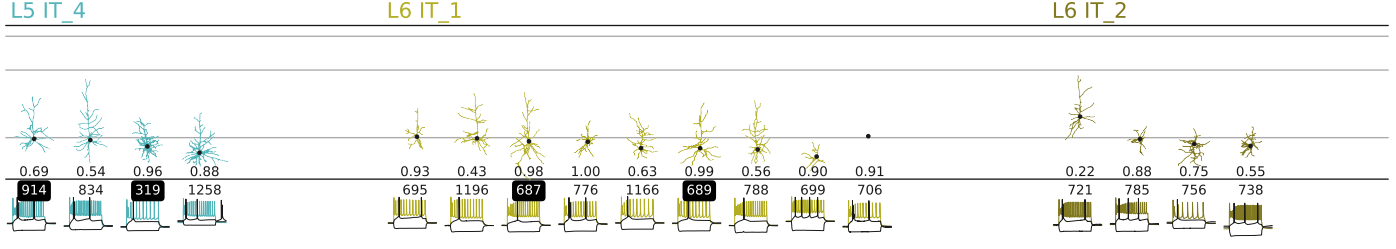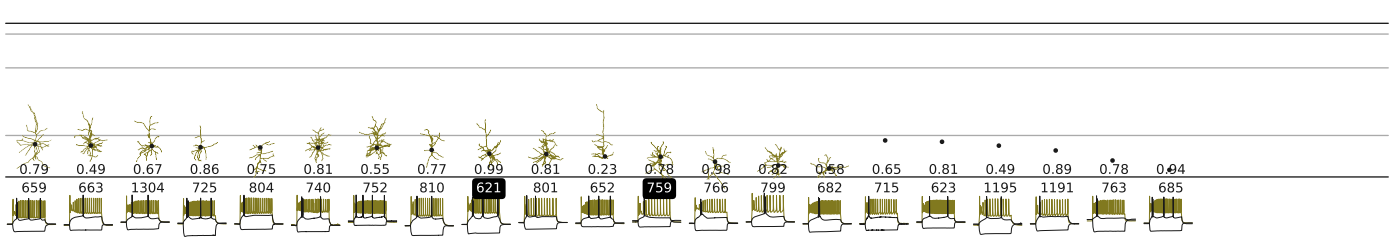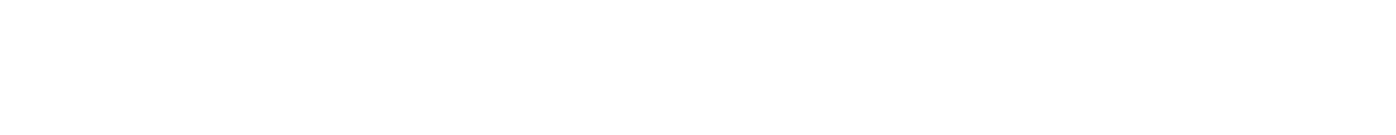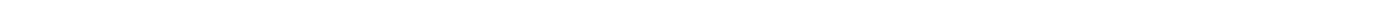

L5 ET\_1

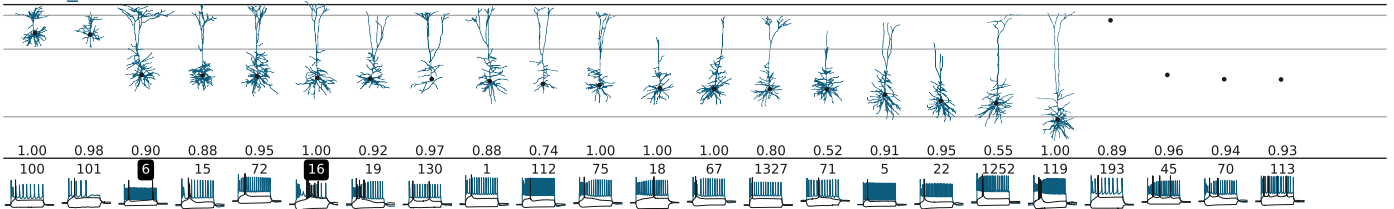

L5 ET\_2

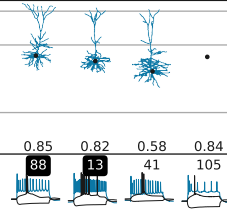

L5 ET\_3

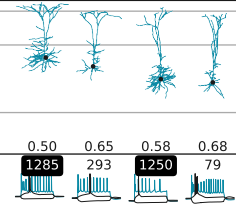

L5 ET\_4

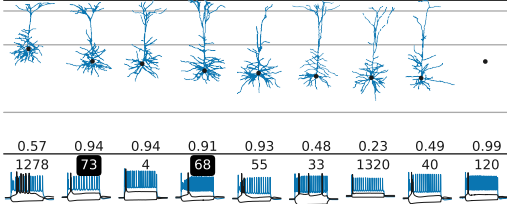

L5/6 NP\_1

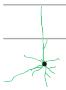

L5/6 NP\_2

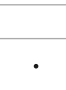

L5/6 NP\_3

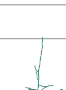

L5/6 NP CT

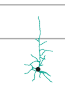

L6 CT Gpr139

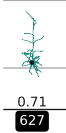

L6 CT Cpa6

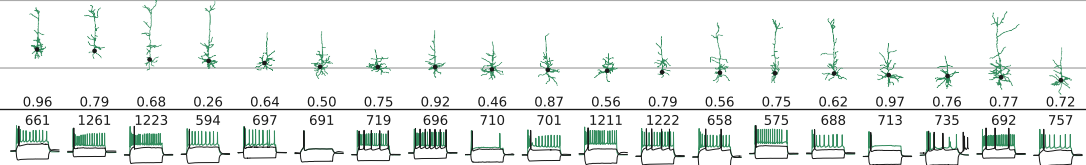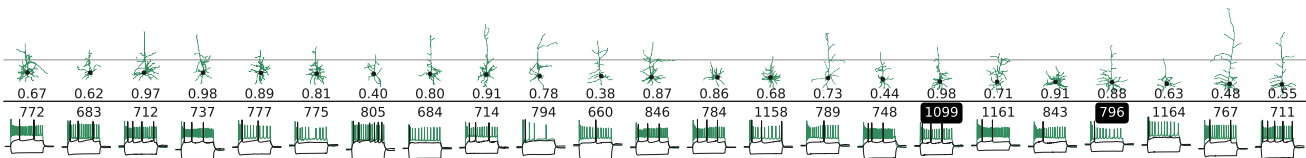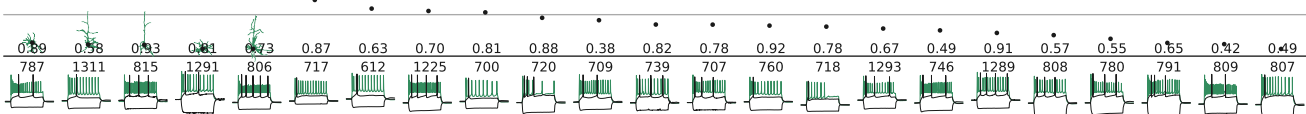

L6 CT Grp

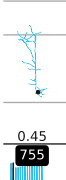

L6 CT Pou3f2

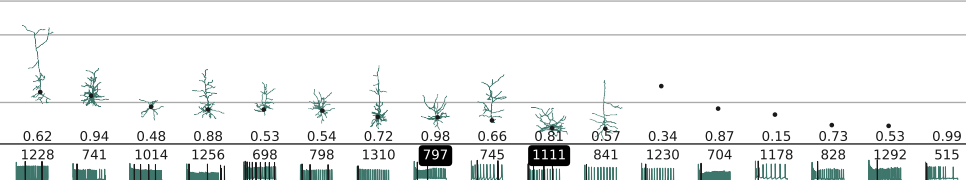



L6b Col6a1

L6b Shisa6\_1

L6b Shisa6\_2

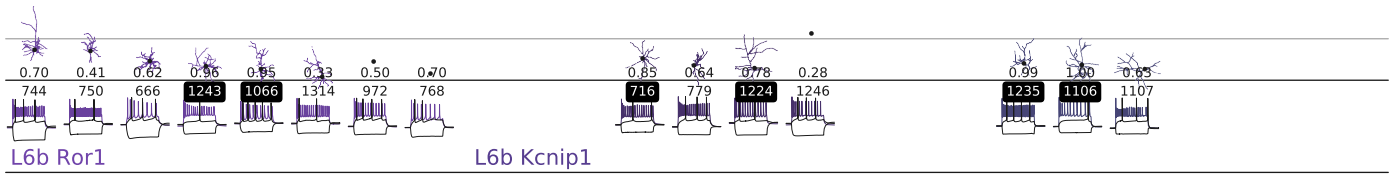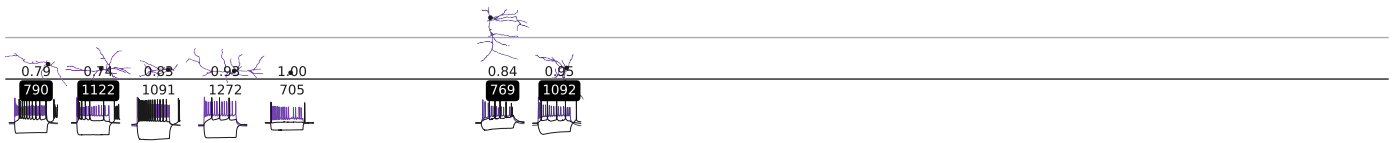

Supplement: NIHMS1681219-supplement-1681219_SuppFile1.pdf [file NIHMS1681219-supplement-1681219_SuppFile1.pdf]
