# Supplementary material for: Phenotypic variation of transcriptomic cell types in mouse motor cortex
Source: PubMed Central journal article supplement (PMC8113357; doi:10.1038/s41586-020-2907-3), 2020-11-12

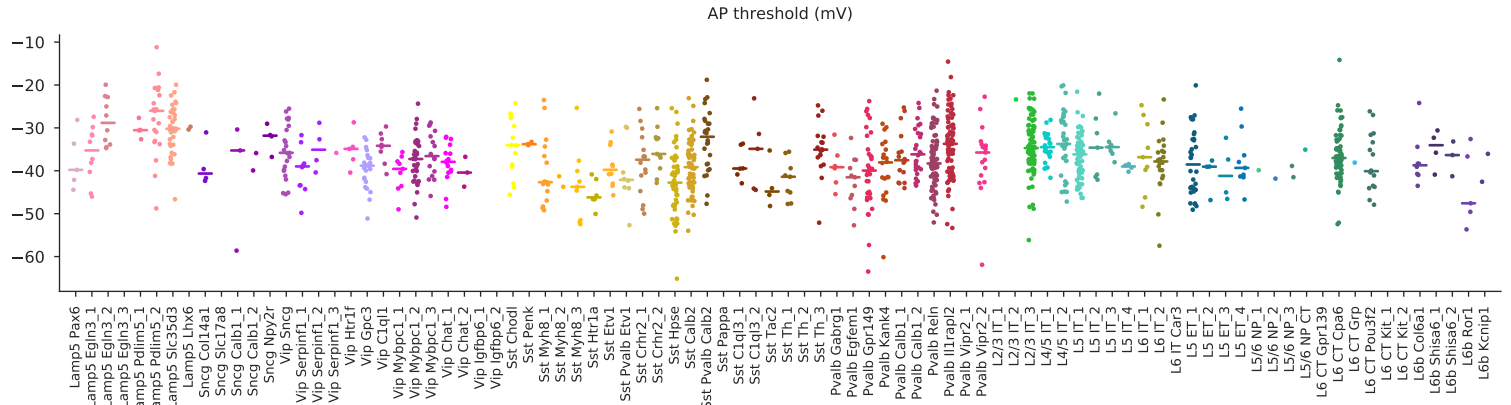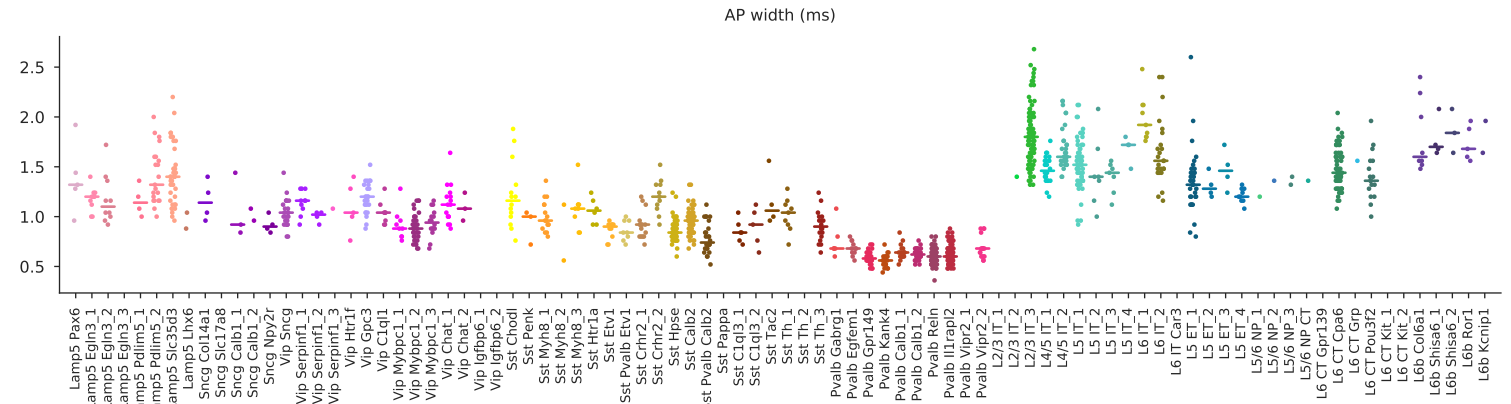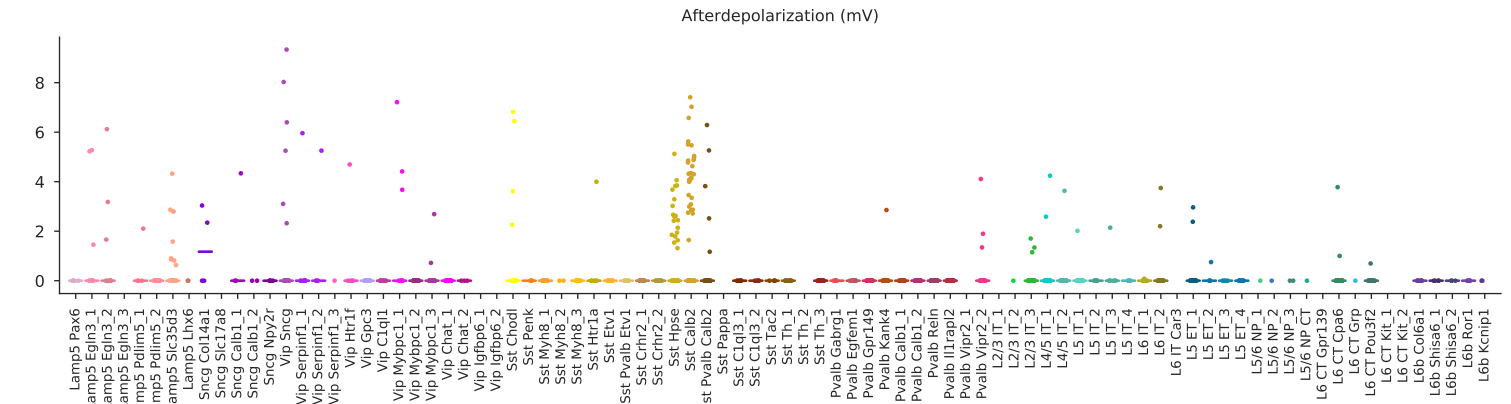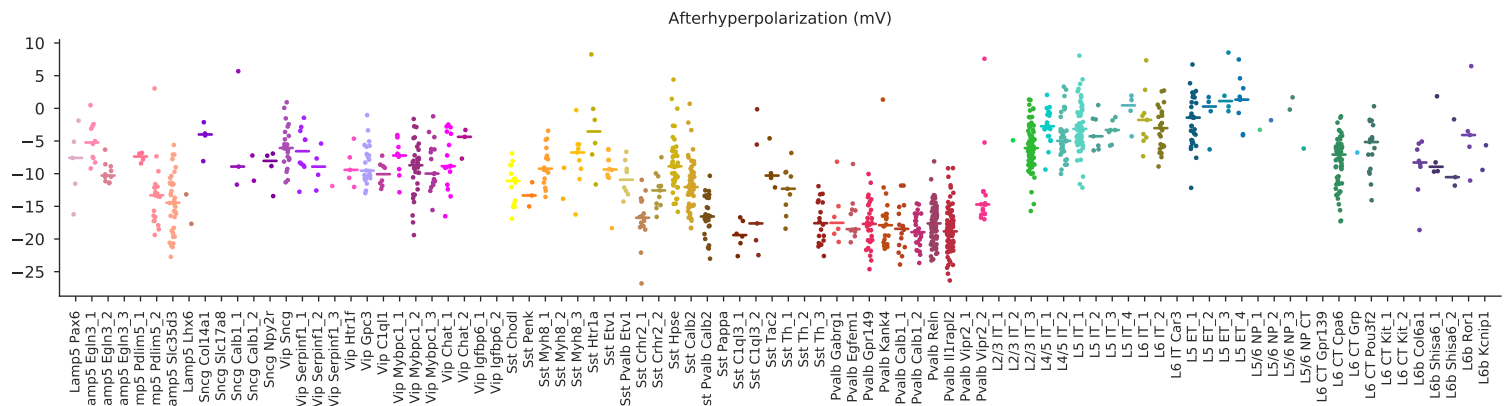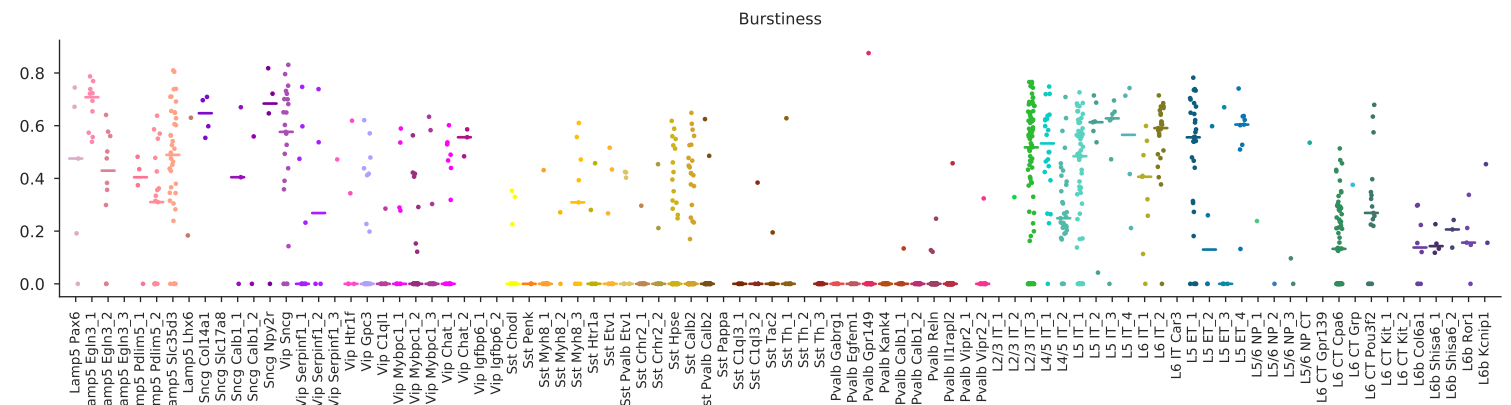



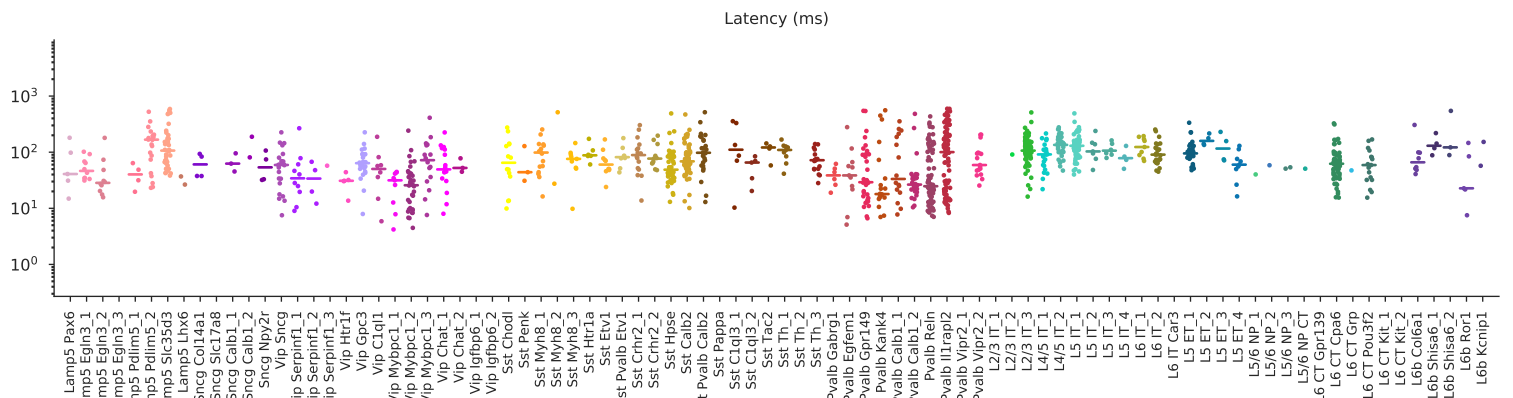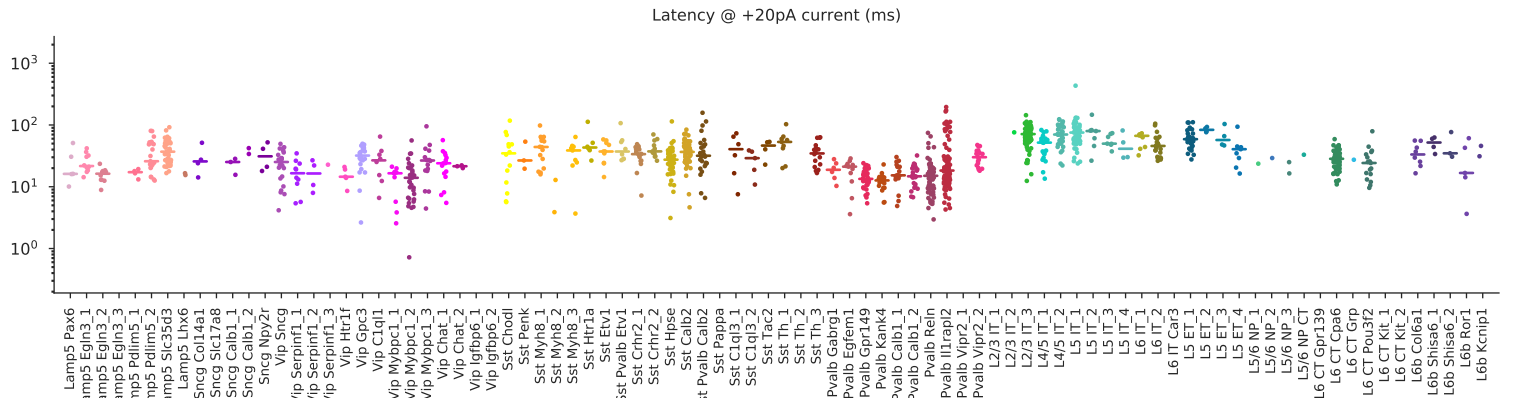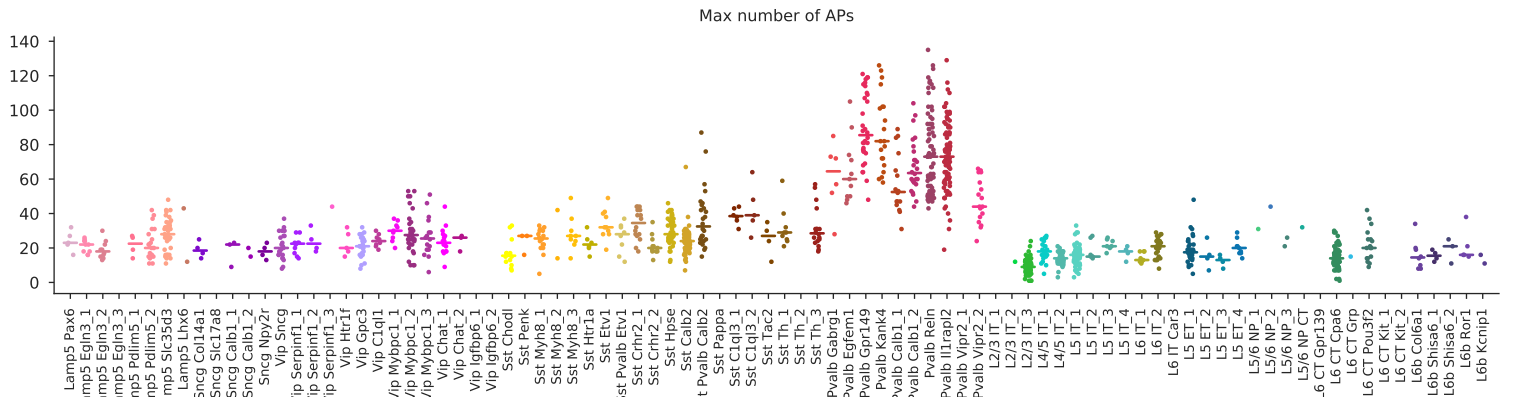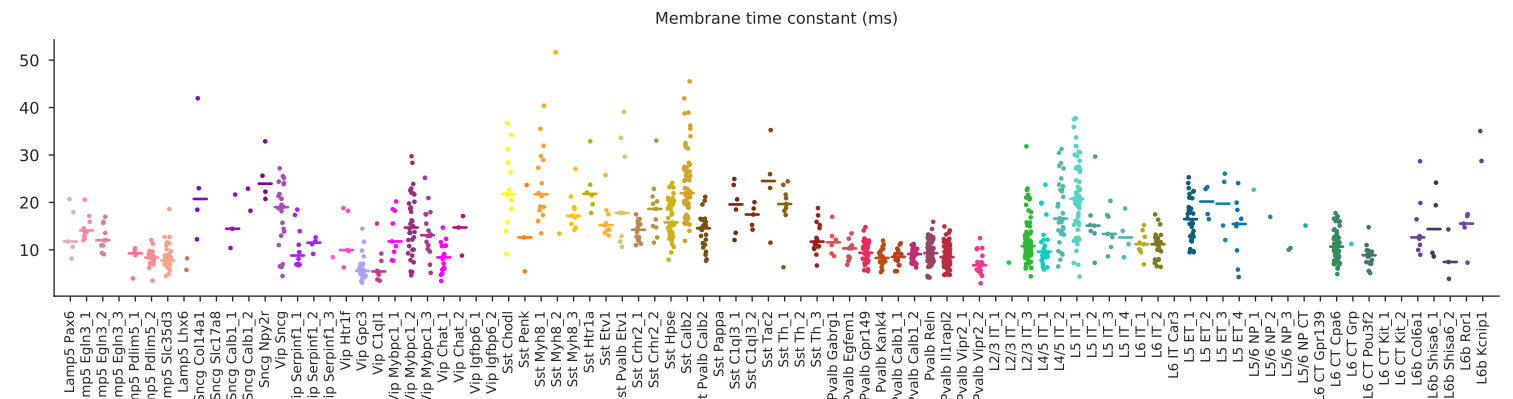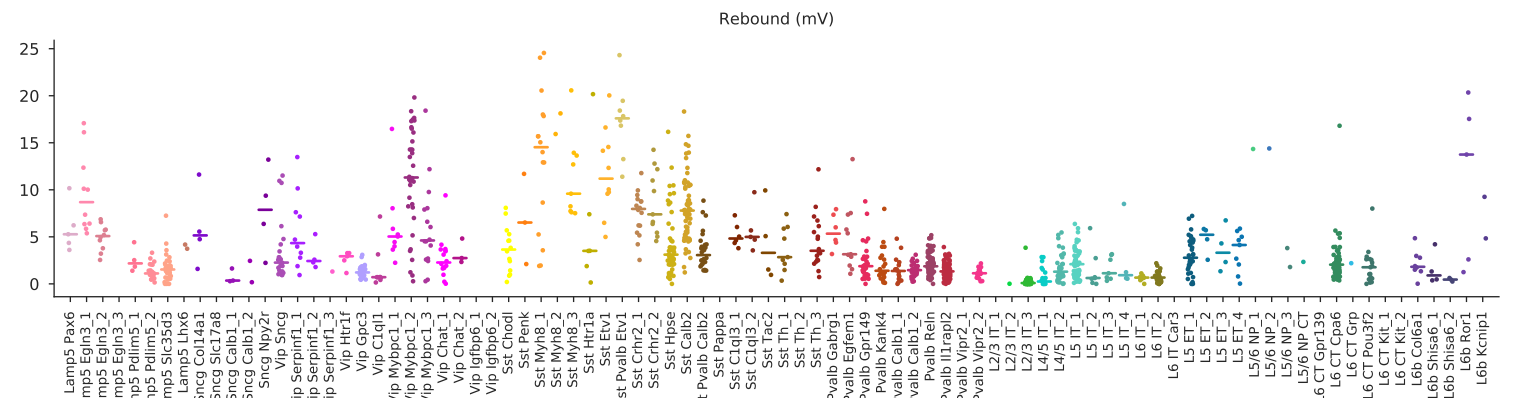

Rebound number of APs

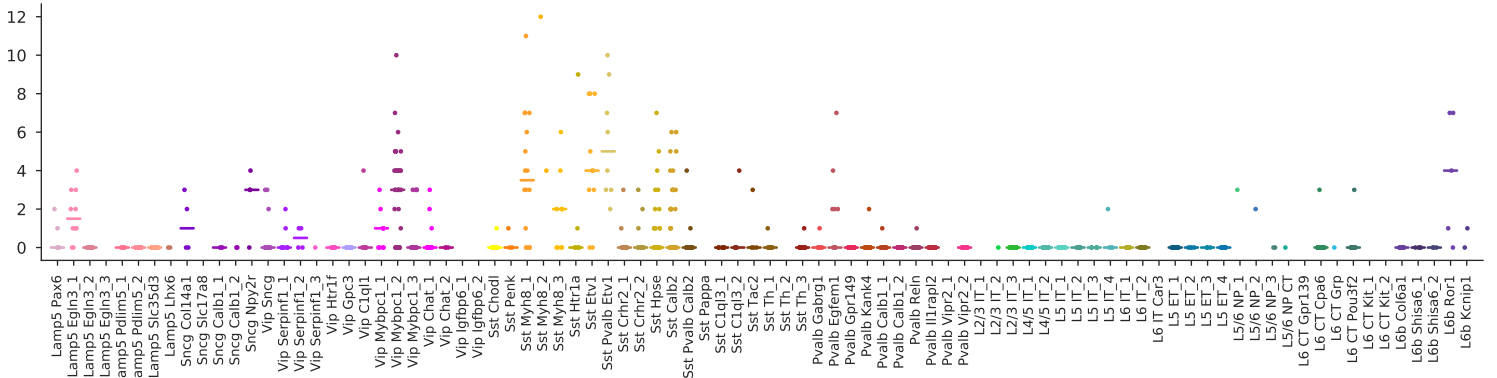

Resting membrane potential (mV)

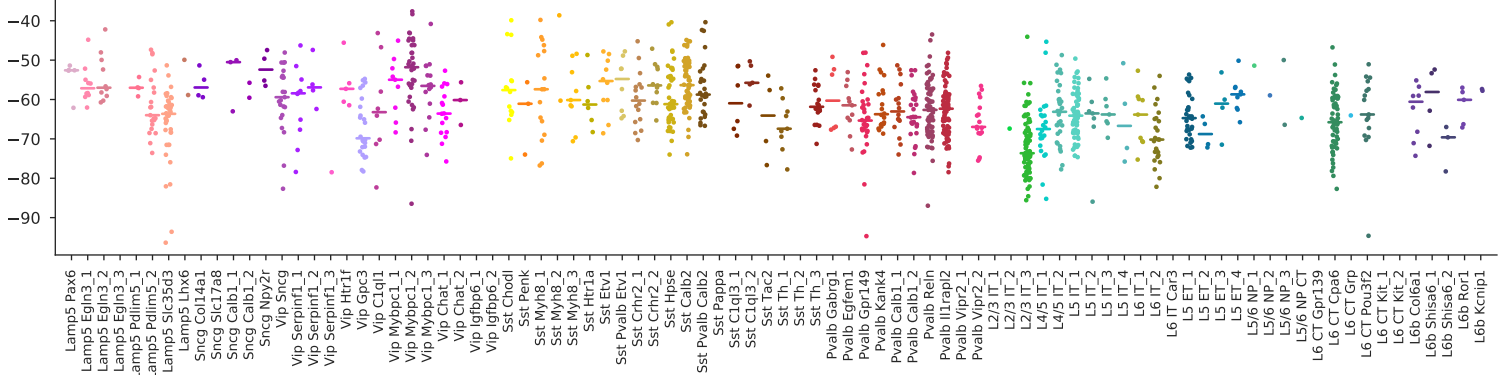

Rheobase (pA)

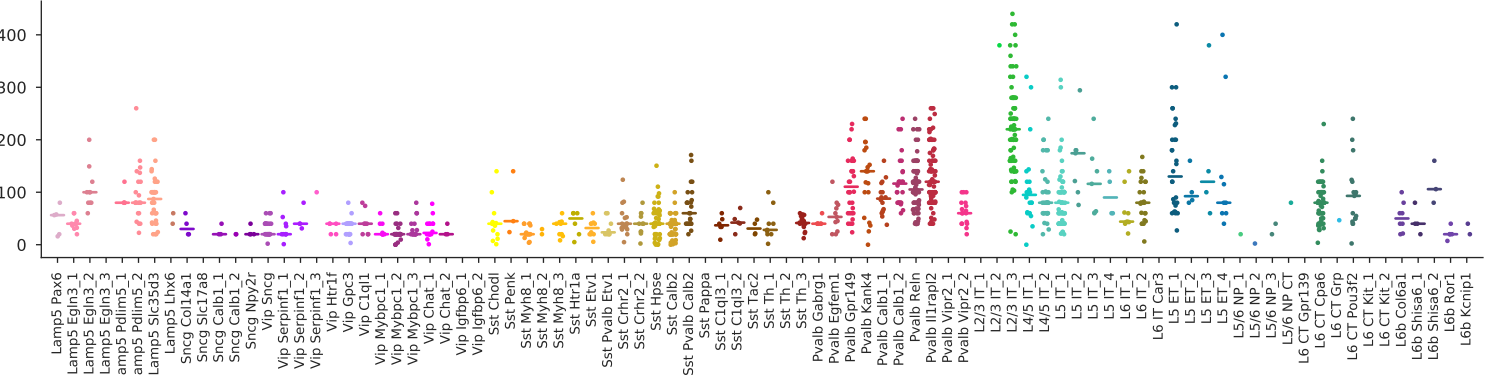

Sag area (mV\*s)

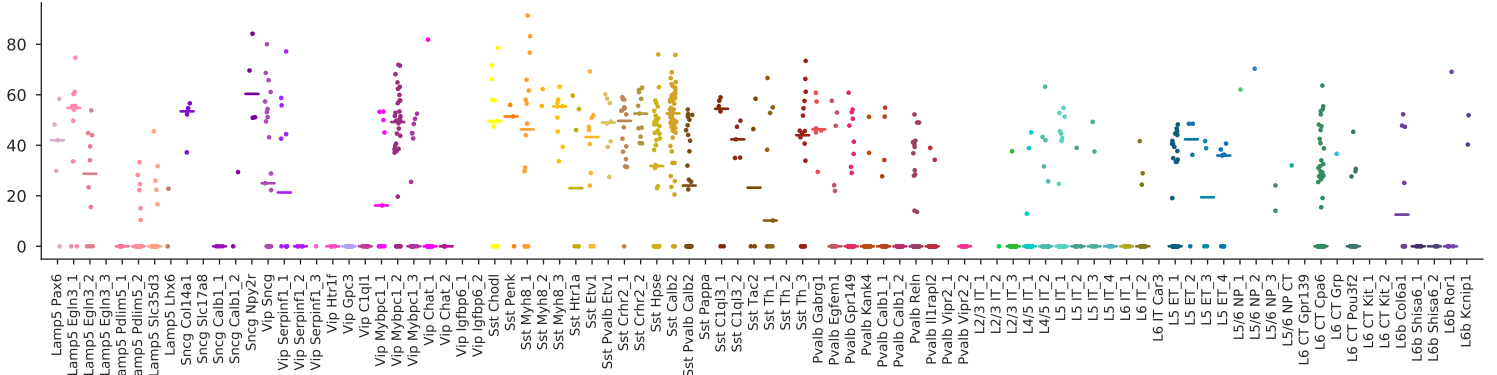

Sag ratio

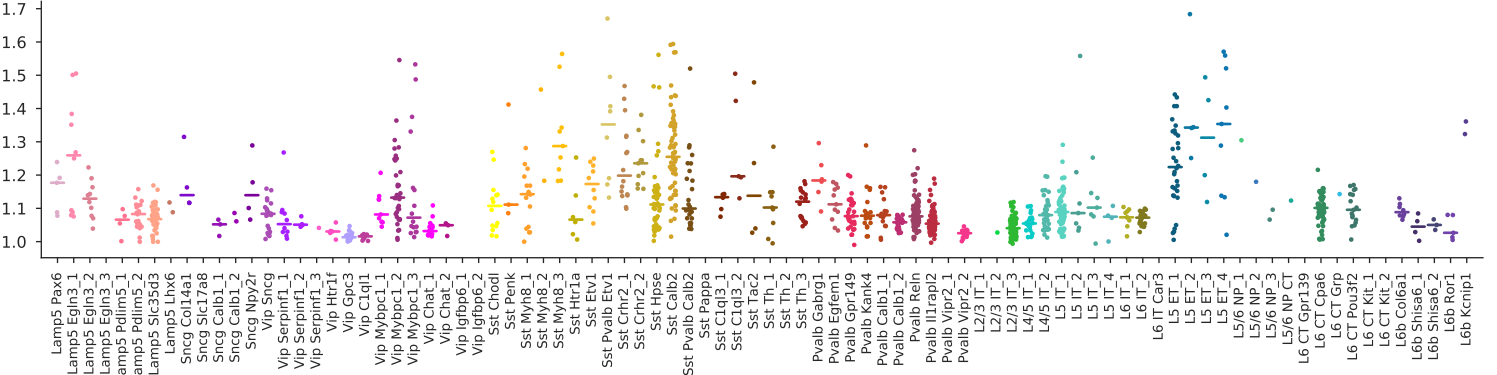

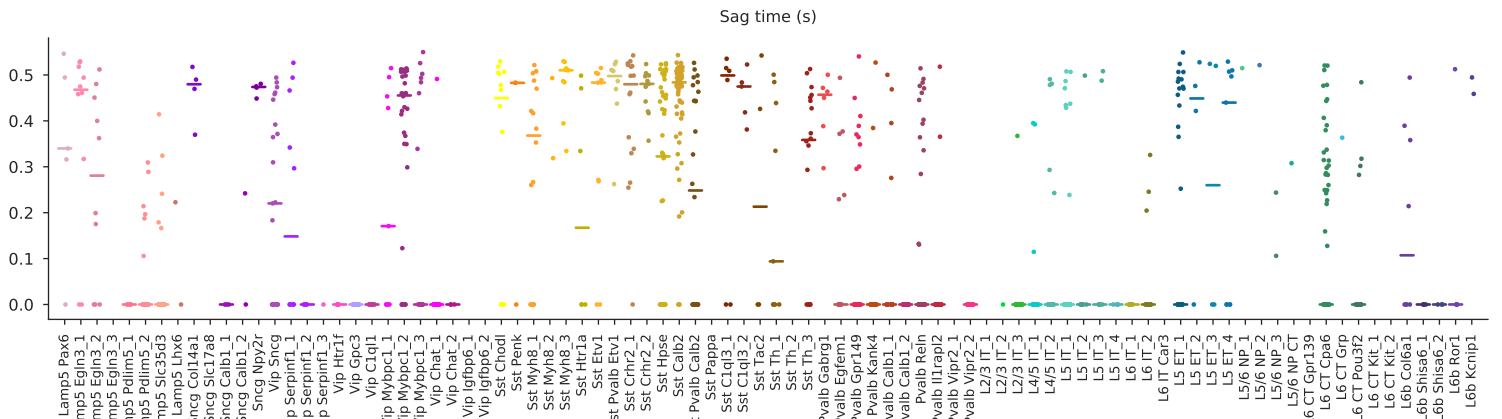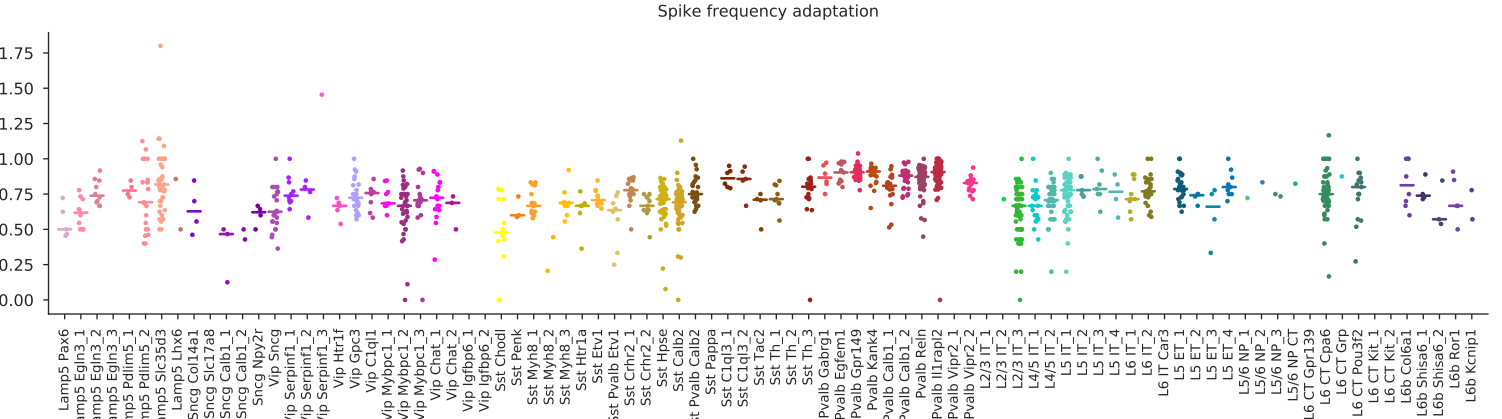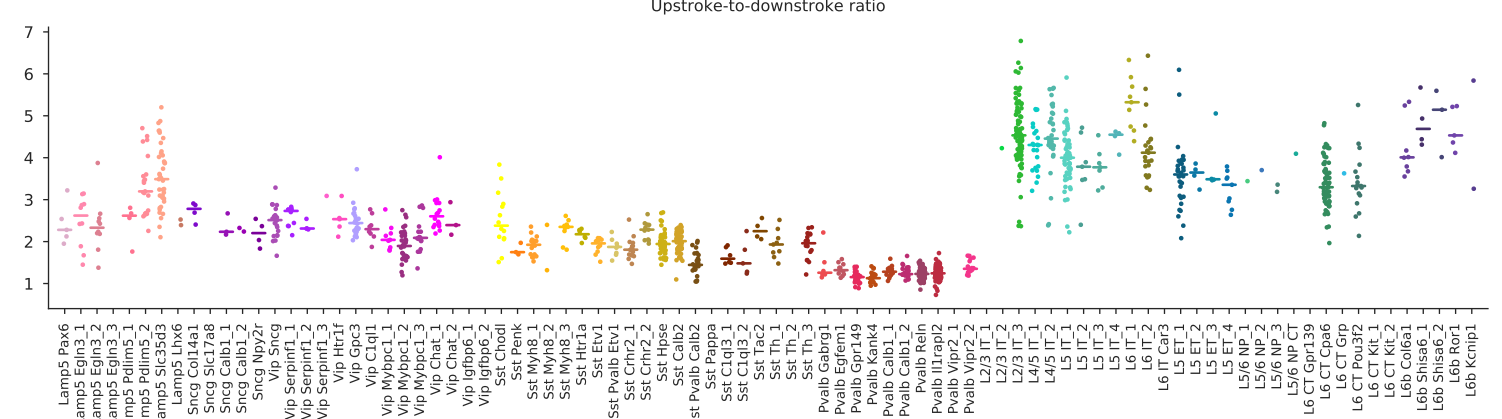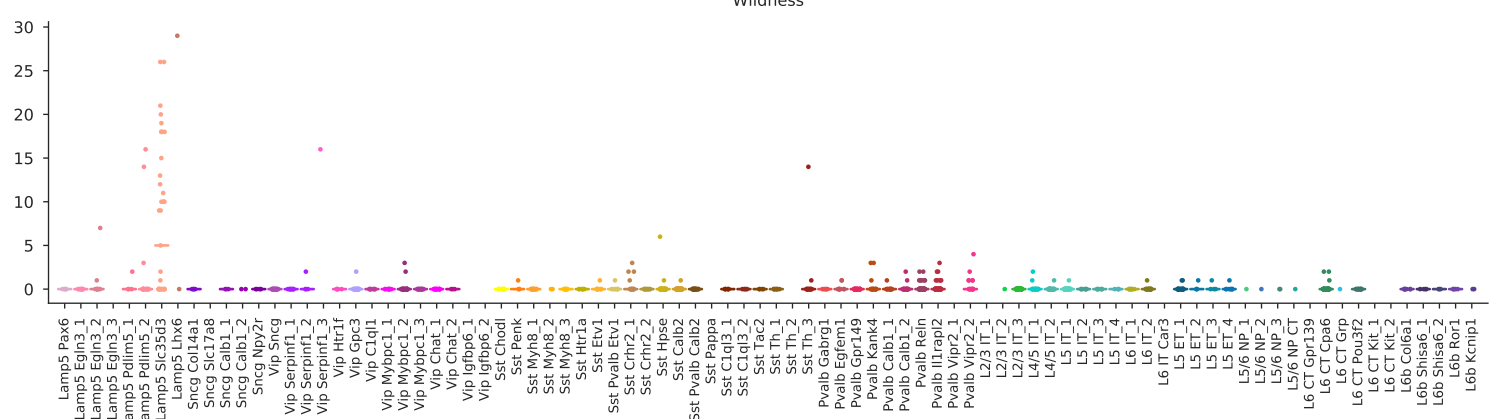

Supplement: NIHMS1681219-supplement-1681219_SuppFile2.pdf [file NIHMS1681219-supplement-1681219_SuppFile2.pdf]
